# Supplementary material for: Community knowledge and practices regarding antibiotic use in rural Mozambique: where is the starting point for prevention of antibiotic resistance?
Source: Springer Nature journal article supplement (doi:10.1186/s12889-020-09243-x), 2020-07-29
Supplement: MOESM3 [file 18229944]

|                                                                                   |                                                                                                                                                               |                                                                                     |
|-----------------------------------------------------------------------------------|---------------------------------------------------------------------------------------------------------------------------------------------------------------|-------------------------------------------------------------------------------------|
|  | <p><b>Appendix N. Informed consent_community members_FGD</b><br/> <b>“Antibiotic access and use in low- and middle-income countries” Acronym: ABACUS.</b></p> |  |
|-----------------------------------------------------------------------------------|---------------------------------------------------------------------------------------------------------------------------------------------------------------|-------------------------------------------------------------------------------------|

The Manhiça Health Research Centre (CISM) is conducting a study on "Access and Use of Antibiotics in Communities in Low and Middle Income Countries in Asia and Africa". In Mozambique the study will take place in the district of Manhiça. We are inviting Mr./Mrs to participate in the study and share their experience in order to contribute to a better understanding of antibiotic access and use in the country.

**Purpose**

The purpose of this study is to learn about how people have access to, and know how to use, antibiotics. The ABACUS study will provide a picture of the current situation and will also tell us how to improve the availability and use of medicines in your community.

Please feel free to ask questions if anything comes up that is unclear or needs additional information related to the study.

**Why was I selected?**

We invite you because you are a representative member of the community we intend to study. We feel that your experience will be useful to understand more about access and use of antibiotics in your community.

**What will happen in this study?**

If you are interested in participating in this study, you will participate in a focus group discussion with 6 to 8 other community members. The conversation is about your experience with obtaining and using antibiotics. The discussions will be recorded and can last about 90 minutes. If you do not accept the recording of the interview, then we will take notes. The discussion will take place at a time and place that offers sufficient privacy and will be agreed upon by other participants and the researcher.

**What are the risks and benefits?**

Your information will be kept strictly confidential and will not be shared with people outside the research group. Audio recordings will be stored securely and you will not be identified in any publication. All focus group participants will be required to respect the privacy of others and to not discuss elsewhere anything that has been raised during discussions. There is no risk for you in taking part in the study. Although there are no direct benefits, your participation will help us formulate recommendations on what needs to be done to improve the use of medicines in the country.

**What will happen with the results of this study?**

We anticipate that the research will help to improve the supply and use of antibiotics in the future. These results will be shared with authorities that make decisions regarding the purchase, distribution and availability of antibiotics in Mozambique and other parts of the world.
