# Supplementary material for: Community knowledge and practices regarding antibiotic use in rural Mozambique: where is the starting point for prevention of antibiotic resistance?
Source: Springer Nature journal article supplement (doi:10.1186/s12889-020-09243-x), 2020-07-29
Supplement: MOESM4 [file 18229944]

|                                                                                   |                                                                                                                                                                                                                                |                                                                                     |
|-----------------------------------------------------------------------------------|--------------------------------------------------------------------------------------------------------------------------------------------------------------------------------------------------------------------------------|-------------------------------------------------------------------------------------|
|  | <p style="text-align: center;"><b>Appendix J. Informed consent_community member_in-depth interview</b></p> <p style="text-align: center;">“Antibiotic access and use in low- and middle-income countries” Acronym: ABACUS.</p> |  |
|-----------------------------------------------------------------------------------|--------------------------------------------------------------------------------------------------------------------------------------------------------------------------------------------------------------------------------|-------------------------------------------------------------------------------------|

The Manhiça Health Research Centre (CISM) is conducting a study on "Access and Use of Antibiotics in Communities in Low and Middle Income Countries in Asia and Africa". In Mozambique the study will take place in the district of Manhiça. We are inviting Mr./Mrs to participate in the study and share his experience in order to contribute to a better understanding of antibiotic access and use in the country.

### **Purpose**

The purpose of this study is to learn about how people have access to and know how to use antibiotics. The ABACUS study will give us a picture of the current situation and will also tell us how to improve the availability and use of medicines in your community.

Please feel free to ask questions if anything comes up that is unclear or needs additional information related to the study.

### **Why was I selected?**

We invite you because you are a representative member of the community we intend to study. We feel that your experience will be useful to understand more about access and use of antibiotics in your community.

### **What will happen in this study?**

If you are interested in participating in this study, we will ask an interview to share your experience with obtaining and using medicines. We would like to know more about where antibiotics are purchased, how they are used and for what reasons. The interviews will be recorded and can last about 60 minutes. If you do not agree to record the interview, then we will take notes. The interview will be held at a time and place that offers sufficient privacy and will be agreed by you and the researcher.

### **What are the risks and benefits?**

Your information will be kept strictly confidential and will not be shared with people outside the research group. Audio recordings will be stored securely and you will not be identified in any publication. Although there are no direct benefits, your participation will help us to formulate recommendations on what needs to be done to improve the use of medicines in the country.

### **What will happen with the results of this study?**

We anticipate that the research will help to improve the supply and use of antibiotics in the future. These results will be shared with authorities that make decisions regarding the purchase, distribution and availability of antibiotics in Mozambique and other parts of the world.
